# Supplementary material for: Unveiling the photoluminescence dynamics of gold nanoclusters with fluorescence correlation spectroscopy
Source: Royal Society of Chemistry journal article supplement (doi:10.1039/d3na00869j), 2023-12-04
Supplement: d3na00869j1.pdf [file d3na00869j1.pdf]

## Supporting Information for

# Unveiling the photoluminescence dynamics of gold nanoclusters with fluorescence correlation spectroscopy

Malavika Kayyil Veedu,<sup>1</sup> Julia Osmólska,<sup>2</sup> Agata Hajda,<sup>2</sup> Joanna Olesiak-Bańska,<sup>2</sup> Jérôme Wenger<sup>1,\*</sup>

<sup>1</sup> Aix Marseille Univ, CNRS, Centrale Marseille, Institut Fresnel, AMUTech, 13013 Marseille, France

<sup>2</sup> Institute of Advanced Materials, Wrocław University of Science and Technology, Wrocław, Poland

\* Corresponding author: [jerome.wenger@fresnel.fr](mailto:jerome.wenger@fresnel.fr)

### Contents:

- S1. TCSPC decays of background
- S2. Comparison of FCS fitting with and without the dark state blinking term
- S3. Supplementary FCS fit results

## S1. TCSPC decays of background

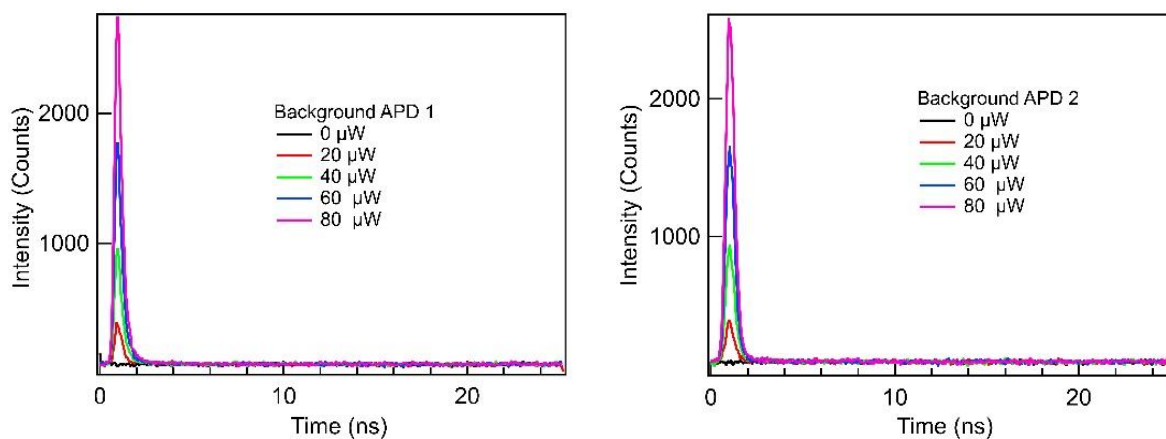

**Figure S1.** TCSPC measurement of D<sub>2</sub>O background at different powers. Here the fluorescence intensity counts in the first 2 ns are mainly due to laser-induced backscattering and Raman scattering. Hence we time gate intensity counts at the first 2 ns to remove the scattering peak and reduce the background.

## S2. Comparison of FCS fitting with and without the dark state blinking term

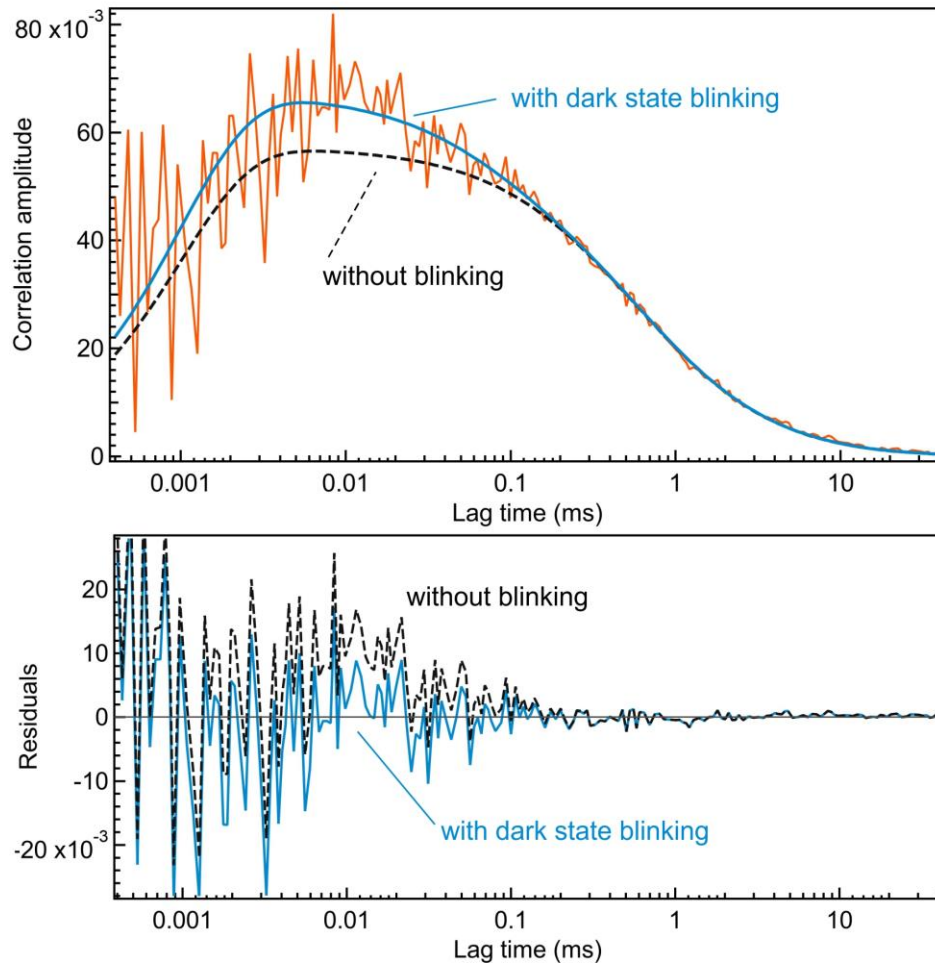

**Figure S2.** Comparison of FCS numerical fits with (solid blue line) and without (dashed gray line) including the term  $\left(1 + \frac{T_{DS}}{(1-T_{DS})} e^{\left(\frac{-t}{\tau_{DS}}\right)}\right)$  accounting for the dark state blinking. The lower graph shows the fit residuals. The excitation power is  $30 \mu\text{W}$ .

### S3. Supplementary FCS fit results

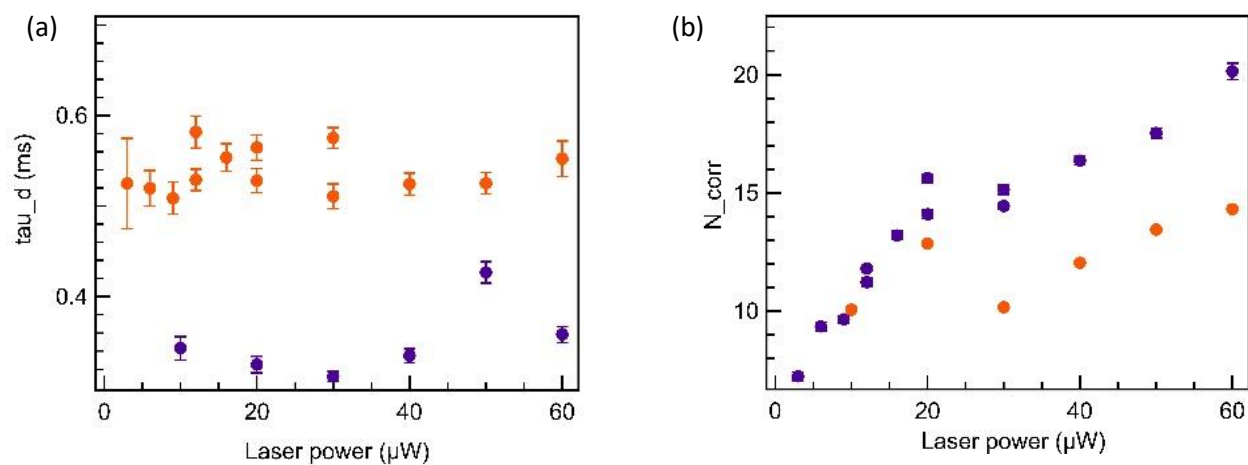

**Figure S3.** a) Diffusion time of Au<sub>18</sub>(SG)<sub>14</sub> with/without PDA at different powers. b) Variation in the number of AuNC in the confocal detection volume  $N_{\text{corr}}$  with/without PDA with power.
